# Supplementary material for: Spaceflight Activates Lipotoxic Pathways in Mouse Liver
Source: PubMed Central journal article supplement (PMC4838331; doi:10.1371/journal.pone.0152877), 2016-04-20

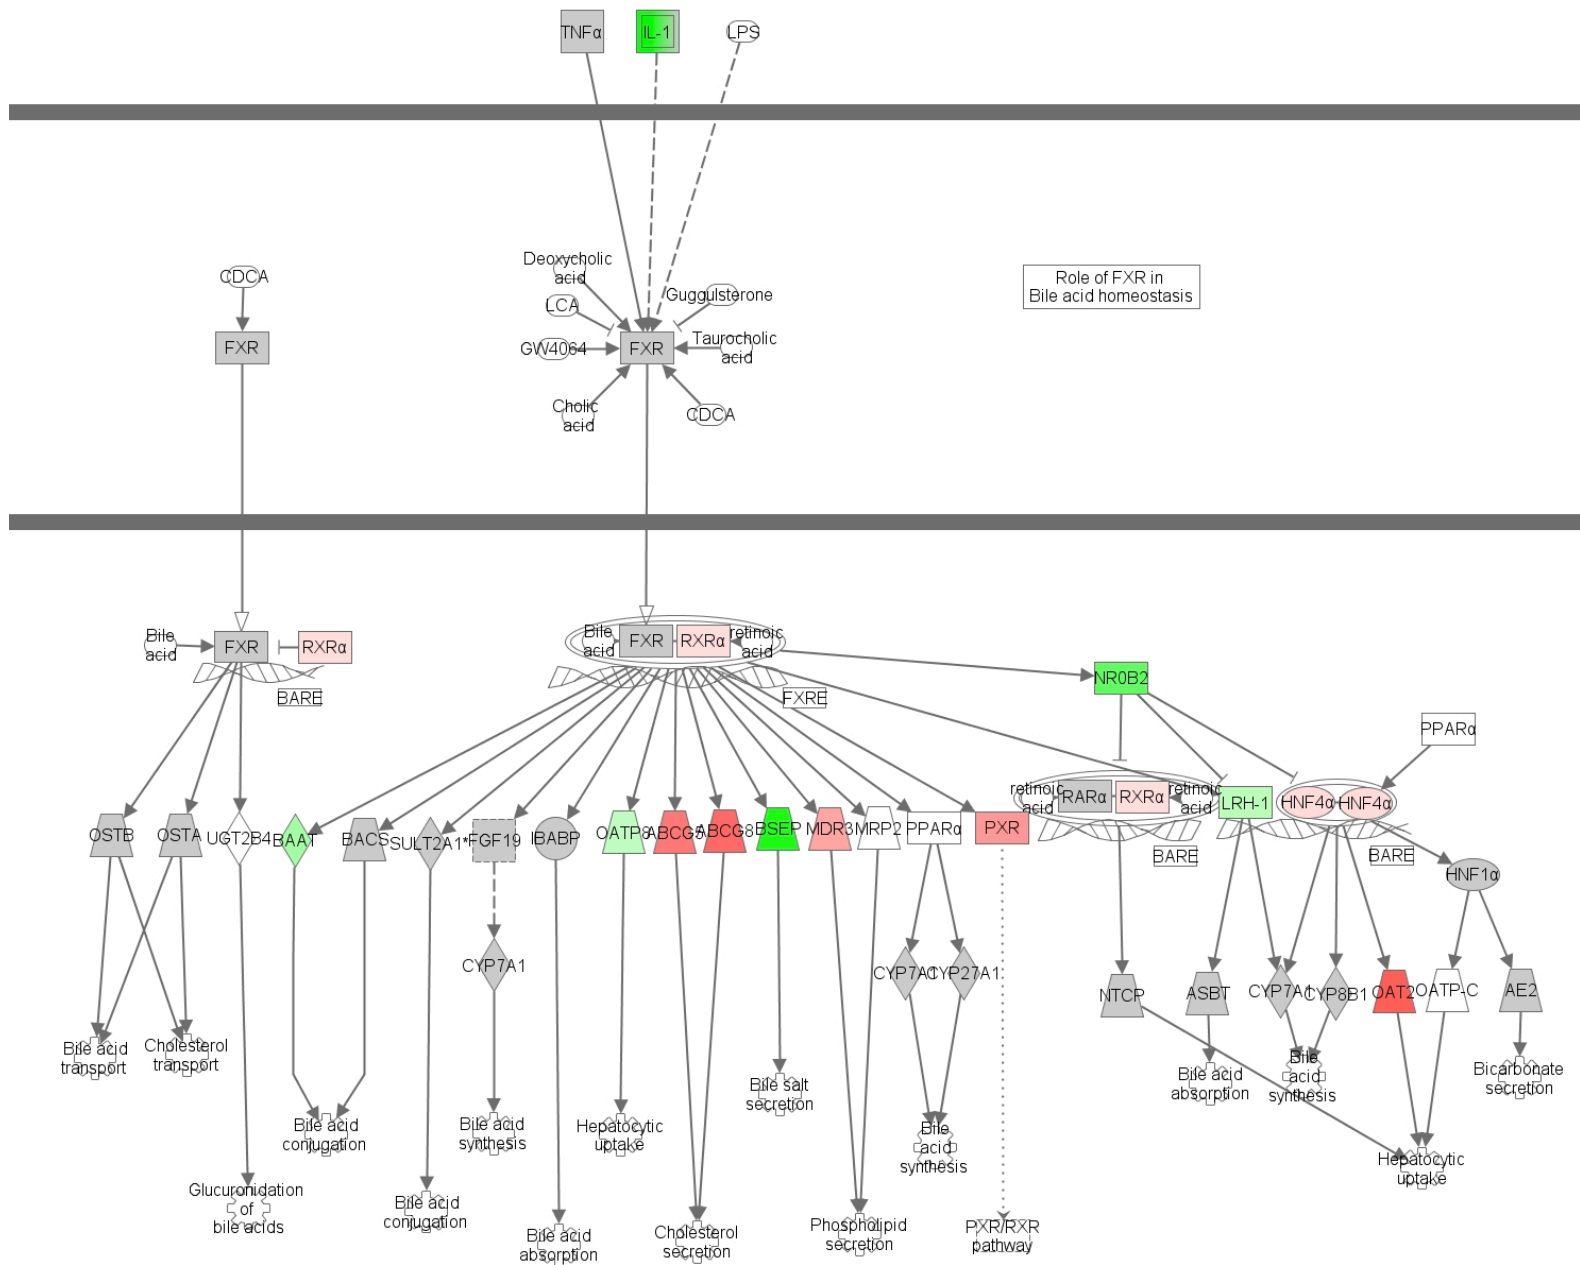

Supplement: pone.0152877.s002.pdf [file pone.0152877.s002.pdf]
