# Supplementary material for: Spaceflight Activates Lipotoxic Pathways in Mouse Liver
Source: PubMed Central journal article supplement (PMC4838331; doi:10.1371/journal.pone.0152877), 2016-04-20

### Saturated

caproate (6:0)  
caprylate (8:0)  
laurate (12:0)  
pelargonate (9:0)  
margarate (17:0)  
myristate (14:0)  
palmitate (16:0)  
pentadecanoate (15:0)  
stearate (18:0)

### AEM FLT

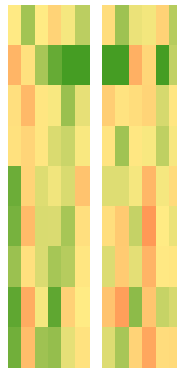

### MUFA

10-heptadecenoate (17:1n7)  
10-nonadecenoate (19:1n9)  
cis-vaccenate (18:1n7)  
eicosenoate (20:1n9 or 11)  
myristoleate (14:1n5)  
oleate (18:1n9)  
palmitoleate (16:1n7)

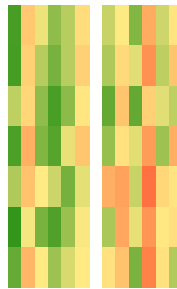

### $\omega 6$

docosapentaenoate (n6 DPA; 22:5n6)  
linoleate (18:2n6)  
adrenate (22:4n6)  
arachidonate (20:4n6)  
dihomo-linoleate (20:2n6)  
docosadienoate (22:2n6)

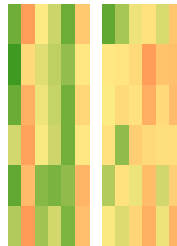

### $\omega 3$

docosahexaenoate (DHA; 22:6n3)  
docosapentaenoate (n3 DPA; 22:5n3)  
eicosapentaenoate (EPA; 20:5n3)  
docosatrienoate (22:3n3)  
stearidonate (18:4n3)  
linolenate [(18:3n3)]  
dihomo-linolenate (20:3n3)

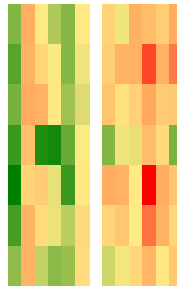

Supplement: pone.0152877.s003.pdf [file pone.0152877.s003.pdf]
